# Supplementary material for: Evaluating the impact of phytosynthesized micronutrient nanoparticles on the growth and propagation of mulberry cuttings: dose determination and toxicity concerns
Source: Royal Society of Chemistry journal article supplement (doi:10.1039/d3en00708a), 2024-01-01
Supplement: d3en00708a1.pdf [file d3en00708a1.pdf]

## **Supplementary Information**

**Evaluating the impact of phytosynthesized micronutrient nanoparticles on the growth and propagation of mulberry cuttings: Dose determination and toxicity concerns**

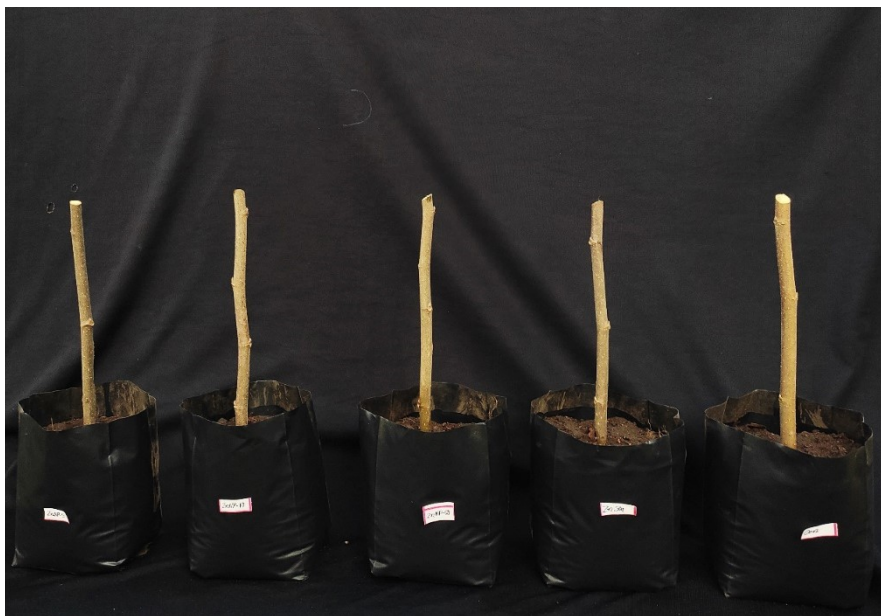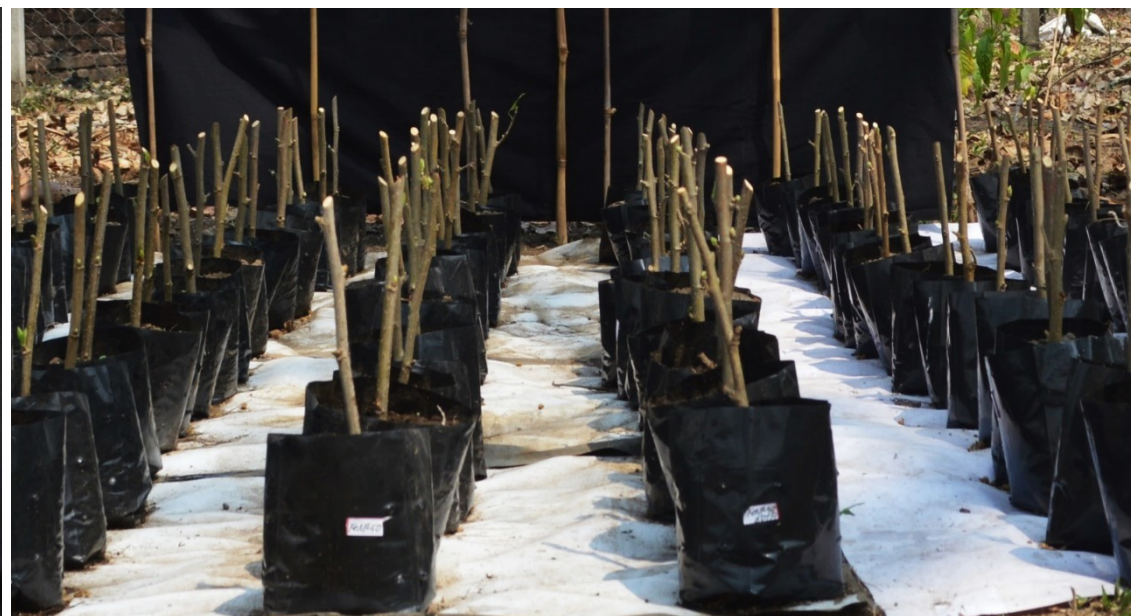

**Fig. S1** Experimental set-up representing the plantation of mulberry cuttings (0 day).

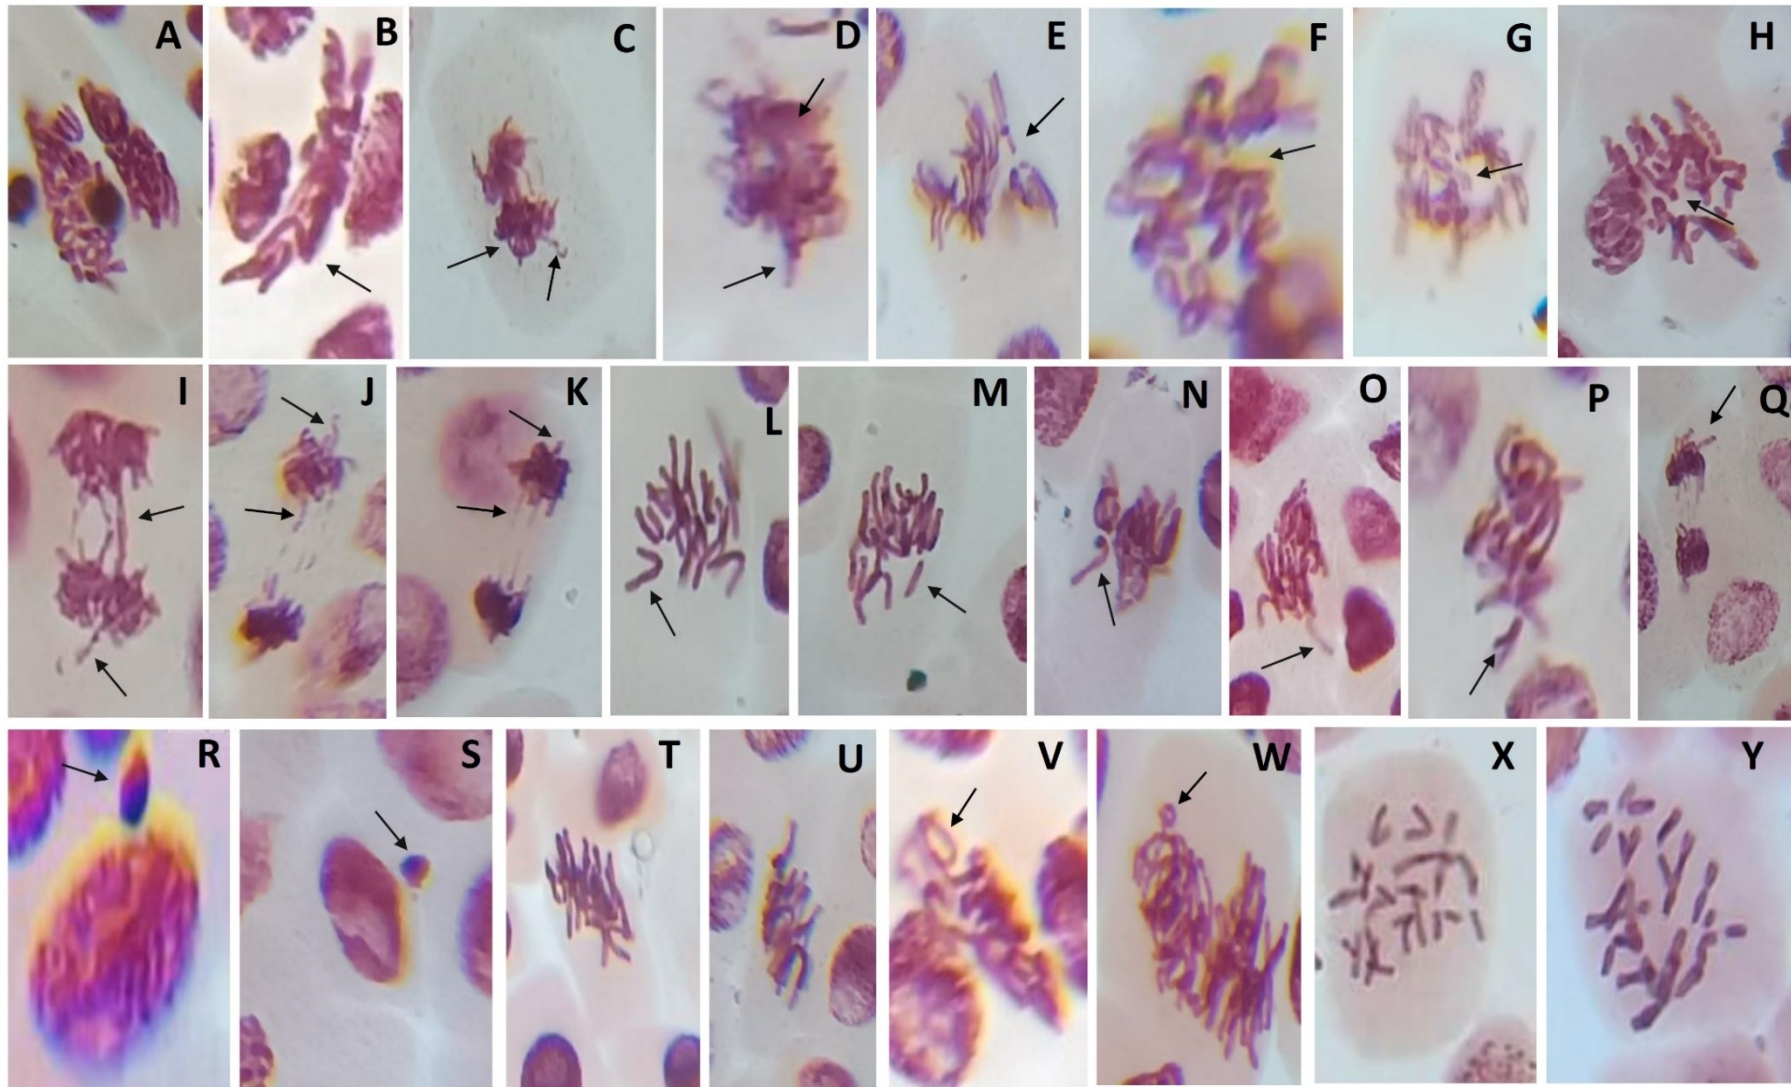

**Fig. S2** Various types of chromosomal aberrations observed in the treated *Allium cepa* root tip cell that have been taken in to account for the calculation of aberration percentage: (A, B) sticky metaphase; (C, D) sticky anaphase with laggard chromosome; (E, F, G, H) disrupted metaphase; (I) chromosomal bridge at anaphase with laggard chromosome; (J, K) chromosomal bridge at telophase with laggard chromosome; (L, M, N) laggard chromosome at metaphase; (O, P) laggard chromosome at anaphase; (Q) laggard chromosome at telophase; (R, S) micronuclei at prophase; (T, U) diagonal metaphase; (V, W) ring chromosome; (X, Y) chromosomal breakage.

**Table S1** Percentage of divisional stages in root tip cells of treated *Allium cepa*

| Treatments       | Divisional stage |           |          |           |
|------------------|------------------|-----------|----------|-----------|
|                  | Prophase         | Metaphase | Anaphase | Telophase |
| ZnNP-5           | 50.372           | 5.761     | 0.753    | 5.740     |
| ZnNP-10          | 51.526           | 7.421     | 0.838    | 5.252     |
| ZnNP-50          | 47.545           | 5.621     | 0.231    | 4.027     |
| MnNP-5           | 50.611           | 3.541     | 0.247    | 3.486     |
| MnNP-10          | 48.563           | 4.808     | 0.487    | 5.157     |
| MnNP-50          | 43.352           | 4.241     | 0.186    | 4.737     |
| CuNP-5           | 41.256           | 3.605     | 0.680    | 2.603     |
| CuNP-10          | 42.043           | 2.661     | 0.135    | 1.719     |
| CuNP-50          | 40.083           | 3.187     | 0.147    | 2.776     |
| Negative Control | 48.571           | 4.019     | 0.244    | 3.528     |
| Positive Control | 38.234           | 3.575     | 0.403    | 2.458     |

The suffix 5, 10, and 50, followed by the micronutrient NPs, represents the concentration of applied nanoparticles in ppm.

**Table S2** Different types and number of chromosomal aberrations in response to various dosages of treated nanoparticles.

| Treatment<br>s      | Aberration types    |                    |                        |                                       |                                        |                                           |                                          |                                           |                                |                       |                       |                        |                          | Sum<br>total |
|---------------------|---------------------|--------------------|------------------------|---------------------------------------|----------------------------------------|-------------------------------------------|------------------------------------------|-------------------------------------------|--------------------------------|-----------------------|-----------------------|------------------------|--------------------------|--------------|
|                     | Sticky<br>metaphase | Sticky<br>anaphase | Disrupted<br>metaphase | Chromosoma<br>l bridge at<br>anaphase | Chromosoma<br>l bridge at<br>telophase | Laggard<br>chromosom<br>e at<br>metaphase | Laggard<br>chromosom<br>e at<br>anaphase | Laggard<br>chromosom<br>e at<br>telophase | micronucle<br>i at<br>prophase | Diagonal<br>metaphase | Diagonal<br>telophase | Ring<br>chromosom<br>e | Chromosoma<br>l breakage |              |
| ZnNP-5              | 2                   | 1                  | 0                      | 1                                     | 2                                      | 1                                         | 0                                        | 1                                         | 0                              | 0                     | 0                     | 0                      | 0                        | 8            |
| ZnNP-10             | 2                   | 0                  | 1                      | 0                                     | 2                                      | 2                                         | 0                                        | 1                                         | 1                              | 1                     | 0                     | 0                      | 0                        | 10           |
| ZnNP-50             | 4                   | 0                  | 1                      | 0                                     | 0                                      | 5                                         | 1                                        | 0                                         | 5                              | 0                     | 0                     | 1                      | 0                        | 17           |
| MnNP-5              | 1                   | 1                  | 2                      | 0                                     | 1                                      | 1                                         | 0                                        | 1                                         | 4                              | 1                     | 0                     | 0                      | 0                        | 12           |
| MnNP-10             | 4                   | 2                  | 3                      | 0                                     | 0                                      | 4                                         | 1                                        | 2                                         | 0                              | 0                     | 0                     | 0                      | 0                        | 16           |
| MnNP-50             | 4                   | 1                  | 3                      | 1                                     | 0                                      | 2                                         | 0                                        | 3                                         | 6                              | 1                     | 0                     | 2                      | 0                        | 23           |
| CuNP-5              | 3                   | 0                  | 0                      | 0                                     | 1                                      | 2                                         | 1                                        | 3                                         | 8                              | 1                     | 0                     | 0                      | 0                        | 19           |
| CuNP-10             | 0                   | 0                  | 1                      | 0                                     | 0                                      | 5                                         | 0                                        | 0                                         | 10                             | 0                     | 0                     | 0                      | 6                        | 22           |
| CuNP-50             | 4                   | 1                  | 0                      | 0                                     | 0                                      | 1                                         | 0                                        | 1                                         | 14                             | 2                     | 3                     | 0                      | 0                        | 26           |
| Negative<br>Control | 3                   | 3                  | 5                      | 0                                     | 0                                      | 5                                         | 0                                        | 3                                         | 0                              | 5                     | 1                     | 0                      | 1                        | 26           |
| Positive<br>Control | 2                   | 1                  | 1                      | 0                                     | 0                                      | 7                                         | 2                                        | 0                                         | 0                              | 0                     | 1                     | 1                      | 0                        | 15           |

The suffix 5, 10, and 50, followed by the micronutrient NPs, represents the concentration of applied nanoparticles in ppm.
